# Supplementary material for: Structure and reactivity studies of the first tungsten cyanoalkylidene complexElectronic supplementary information (ESI) available: experimental details. See http://www.rsc.org/suppdata/cc/b2/b202110b/
Source: Royal Society of Chemistry journal article supplement (doi:10.1039/b202110b), 2002-04-25
Supplement: b202110b.doc [file b202110b.doc]

# The first tungsten cyano-alkylidene and novel alkylidene-nitrile reactivity

Thomas M. Cameron, A.S. Gamble, Khalil A. Abboud and James M. Boncella*

Department of Chemistry and Center for Catalysis,

University of Florida, Gainesville, FL 32611-7200, USA

General Methods

All reactions were conducted under a dry argon atmosphere using standard Schlenk techniques and all compounds were handled in a nitrogen-filled dry box. All solvents were distilled under nitrogen from sodium or sodium benzophenone ketyl or passed over activated alumina, stored over molecular sieves, and degassed prior to use. The W(CHCMe2Ph)(NAr)[OCMe(CF3)2]2 (Ar = 2, 6 diisopropylphenyl) was prepared according to literature procedure.[[1]](#endnote-2) The PMe3 used was purchased from Aldrich dried over molecular sieves and degassed prior to use. Prior to use the acrylonitrile was placed over molecular sieves, distilled and collected over molecular sieves, then degassed prior to use. The acrylonitrile purified in this manner must be used within weeks of purification or reaction yields begin to suffer presumably due to decomposition of acrylonitrile. NMR spectra were obtained on a Varian Gemini 300, VXR 300, Mercury 300, or Inova 500 instrument with C6D6, C7D8, or CD3CN as solvents, as noted, and referenced to residual solvent peaks.

**Synthesis and characterization of [W(CHCN)(NAr)[OCMe(CF3)2]2]4 5:** To a 7.0 ml CH2Cl2 solution of **4** (0.50 g, 0.59 mmol) was added acrylonitrile (38.9 μl, 0.59 mmol) without stirring. The reaction was left to stand overnight in an inert atmosphere glovebox and during this time yellow crystals of **5** grew on the walls of the reaction flask. The crystals were isolated by filtration in 30 % yield. Attempts to isolate more crystals from the mother liquors were not successful and 1H NMR spectroscopy of these mother liquors gave an intractable mixture. Anal. Calcd for C88H96F48N8O8: C, 34.76; H, 3.18; N, 3.68. Found: C, 34.82; H, 3.23; N, 3.71. Crystals of **5** are very insoluble in conventional NMR solvents such as C6D6, CDCl3, or CD2Cl2. Complex **5** does dissolve in CD3CN but the 1H NMR spectrum of this solution is complicated predominately due to extremely broad resonances. No other characterization by solution NMR spectroscopy can be provided for **5** due to solubility concerns.

**Reaction of [W(CHCN)(NAr)[OCMe(CF3)2]2]4 (5) with PMe3:** To a heterogeneous mixture of **5** in CD2Cl2 (0.024g, .008 mmol) was added 4 equivalents of PMe3 (3.3 μl, 0.032 mmol ). Crystals of **5** disappeared from the reaction mixture after 3 hours. Two new alkylidene resonances are observed in the 1H NMR spectrum of this mixture supporting the formation of at least 2 different alkylidene complexes. Variable temperature, multinuclear, 2D NMR techniques were used in attempts to identify the geometry of the complex and any fluctional processes present. The solution NMR spectra are consistent with the formation of alkylidene complexes of the type W(CHCN)(PMe3)(NAr)[OCMe(CF3)2]2 (**7**) however it is not possible to assign an overall geometry to **7**.

**Reaction of 7 with benzaldehyde:** A sample of **7** generated in *situ* following the above procedure was treated with one equivalent of benzaldehyde (3.3 μl, 0.032 mmol). Organic product *trans*-cinamonitrile was observed in the reaction mixture by 1H NMR spectroscopy after 12 hours and the reaction was 50 % complete after 3 days. The 1H NMR spectrum of the produced *trans*-cinamonitrile was compared with that of an authentic sample purchased from Aldrich in order to confirm its identity.

**Synthesis of [W(N(H)C(CH3)C(CN)C(CH3)N)(NAr)[OCMe(CF3)2]2]4 (6):** An NMR tube was charged with approximately 10 mgs of **5** in CD3CN. After several weeks X-ray quality crystals of **6** were isolated from the NMR tube and an X-ray crystallographic study was carried out. Due to the small amount of sample produced by this reaction we have not acquired any other analytical data at this point.

**Cross-metathesis of acrylonitrile and 1-decene catalysed by 2:** In a typical reaction 1-decene (0.87 mgs, 0.63 mmol) was added to a stirring CD2Cl2 solution of **2** (9.0 mgs, 0.013 mmol) followed by immediate addition of acrylonitrile (50.0 mgs, 0.94 mmol). The reaction was stirred for 20 hours in a nitrogen filled glove box. The reaction mixture was analyzed by 1H NMR spectroscopy and after the allotted time all of the 1-decene had reacted affording the cross-metathesis product.

**Drawings of 5 and 6:**

**X-ray experimental for 5**: Data were collected at 173 K on a Siemens SMART PLATFORM equipped with A CCD area detector and a graphite monochromator utilizing MoK radiation ( = 0.71073 Å). Cell parameters were refined using up to 8192 reflections. A hemisphere of data (1381 frames) was collected using the -scan method (0.3 frame width). The first 50 frames were remeasured at the end of data collection to monitor instrument and crystal stability (maximum correction on I was < 1 %). Absorption corrections by integration were applied based on measured indexed crystal faces.

The structure was solved by the Direct Methods in *SHELXTL5,[[2]](#endnote-3)* and refined using full-matrix least squares. The non-H atoms were treated anisotropically, whereas the hydrogen atoms were calculated in ideal positions and were riding on their respective carbon atoms, except H1 and H3 on C1 and C3, respectively, which were located from a Difference Fourier Map and refined without any constraints.One (CH3)(CF3)2 group was found to be clearly disordered and was refined in two parts. Their site occupation factors were dependently refined to 0.60(1) for the major part, and consequently 0.40(1) for the minor part. The major and minor parts of the were also constrained to be respectively equivalent. All F atoms in the disorder were refined with one common thermal parameter. Other similar groups were slightly disordered as can be seen from their elongated thermal ellipsoid drawings but were not significant enough to be resolved. The asymmetric unit consists of a half a tetramer located on a two-fold rotation axis. A total of 703 parameters (with 92 restraints) were refined in the final cycle of refinement using 10462 reflections with I > 2(I) to yield R1 and wR2 of 4.18% and 10.90%, respectively. Refinement was done using F2.

**X-ray experimental for 6**: Data were collected at 173 K on a Siemens SMART PLATFORM equipped with A CCD area detector and a graphite monochromator utilizing MoK radiation ( = 0.71073 Å). Cell parameters were refined using up to 8192 reflections. A full sphere of data (1381 frames) was collected using the -scan method (0.3 frame width). The first 50 frames were remeasured at the end of data collection to monitor instrument and crystal stability (maximum correction on I was < 1 %). Absorption corrections by integration were applied based on measured indexed crystal faces.

The structure was solved by the Direct Methods in *SHELXTL5,*2and refined using full-matrix least squares. The non-H atoms were treated anisotropically, whereas the hydrogen atoms were calculated in ideal positions and were riding on their respective carbon atoms. The N1, N5 N9 and N13 protons were obtained from a Difference Fourier map and refined freely. In the final stages of refinement, those H atoms were idealized and were treated riding on their respective N atoms. The asymmetric unit consists of the tetramer and three molecules of acetonitrile. Those three molecules were badly disordered and could not be resolved. Thus their contributions to the overall diffraction intensity were removed using program SQUEEZE (part of PLATON, Spec, 1990).[[3]](#endnote-4) The structure was refined without the solvent molecules. A total of 1651parameters were refined in the final cycle of refinement using 21983 reflections with I > 2(I) to yield R1 and wR2 of 5.77% and 15.59%, respectively. Refinement was done using F2.

1. R. R. Schrock, R. T. DePue, J. Feldman, K. B. Yap, D. C. Yang, W. M. Davis, L. Park, M. DiMare, M. Schofield, J, Anhaus, E. Walborsky, E. Evitt, C. Krüger and P. Betz, *Organometallics*, 1990, **9**, 2262. [↑](#endnote-ref-2)
2. Sheldrick, G. M. (1998). *SHELXTL5*. Bruker-AXS, Madison, Wisconsin, USA. [↑](#endnote-ref-3)
3. Spek, A. L. (1990). Acta Cryst. A46, 1-34 [↑](#endnote-ref-4)
